# Supplementary material for: Comprehensive Analysis Reveals the Evolution and Pathogenicity of Aeromonas, Viewed from Both Single Isolated Species and Microbial Communities
Source: PubMed Central journal article supplement (PMC6811364; doi:10.1128/msystems.00252-19), 2019-10-22
Supplement: mSystems.00252-19-st001.pdf [file mSystems.00252-19-st001.pdf]

Supplementary Table S1. Bacterial strains and sources used for the genomic comparison of 29 *Aeromonas* species in this study.

| Organism                              | RefSeq accession | Source                               | Size (Mb) | Genes | Proteins | Taxid   |
|---------------------------------------|------------------|--------------------------------------|-----------|-------|----------|---------|
| <i>A. allosaccharophila</i> CECT 4199 | GCF_000819685.1  | Diseased elver                       | 4.66      | 4,325 | 4,065    | 656     |
| <i>A. aquatica</i> MX16A              | GCF_001895965.1  | Environment, water                   | 4.78      | 4,445 | 4,208    | 558964  |
| <i>A. australiensis</i> CECT 8023     | GCF_000819725.1  | Environment, Irrigation water system | 4.11      | 3,799 | 3,585    | 1114880 |
| <i>A. bestiarum</i> CECT 4227         | GCF_000819745.1  | Diseased fish                        | 4.69      | 4,236 | 4,075    | 105751  |
| <i>A. bivalvium</i> CECT 7113         | GCF_000819765.1  | Cockles                              | 4.3       | 4,002 | 3,765    | 440079  |
| <i>A. caviae</i> CECT 838             | GCF_000819785.1  | Guinea pig                           | 4.47      | 4,177 | 3,948    | 648     |
| <i>A. dhakensis</i> AAK1              | GCF_000315195.1  | Human, Blood                         | 4.76      | 4,373 | 4,207    | 1156800 |
| <i>A. diversa</i> CECT 4254           | GCF_000819805.1  | Human, Wound                         | 4.06      | 3,864 | 3,657    | 1268237 |
| <i>A. encheleia</i> CECT 4342         | GCF_000819825.1  | Healthy eel in fresh water           | 4.47      | 4,145 | 3,970    | 73010   |
| <i>A. enteropelogenes</i> CECT 4487   | GCF_000819845.1  | Human, Stool                         | 4.47      | 4,158 | 3,958    | 29489   |
| <i>A. eucrenophila</i> CECT 4224      | GCF_000819865.1  | Freshwater fish                      | 4.54      | 4,159 | 3,996    | 649     |
| <i>A. finlandiensis</i> 4287D         | GCF_000764645.1  | Environment, Lake water              | 4.72      | 4,475 | 4,074    | 1543375 |
| <i>A. fluvialis</i> LMG 24681         | GCF_000819885.1  | Environmental, River water           | 3.9       | 3,686 | 3,408    | 591962  |
| <i>A. hydrophila</i> ATCC 7966        | GCF_000014805.1  | Tin of milk with a fishy odour       | 4.74      | 4,283 | 4,118    | 380703  |
| <i>A. jandaei</i> CECT 4228           | GCF_000819955.1  | Human, Stool                         | 4.5       | 4,254 | 3,993    | 650     |
| <i>A. lacus</i> AE122                 | GCF_000764665.1  | Environment, Lake water              | 4.39      | 4,082 | 3,863    | 558884  |
| <i>A. media</i> WS                    | GCF_000287215.2  | Environment, Water                   | 4.78      | 4,468 | 4,076    | 1208104 |
| <i>A. molluscorum</i> 848             | GCF_000388115.1  | Wedge shells                         | 4.24      | 4,090 | 3,596    | 1268236 |
| <i>A. piscicola</i> LMG 24783         | GCF_000820005.1  | Salmon                               | 5.18      | 4,917 | 4,595    | 600645  |
| <i>A. popoffii</i> CIP 105493         | GCF_000820025.1  | Environmental, Water                 | 4.76      | 4,472 | 4,126    | 70856   |
| <i>A. rivuli</i> DSM 22539            | GCF_000820045.1  | Environment, Karst hardwater creek   | 4.53      | 4,292 | 4,040    | 648794  |
| <i>A. salmonicida</i> ATCC 33658      | GCF_001643305.1  | Salmo salar                          | 4.73      | 4,462 | 4,108    | 29491   |
| <i>A. sanarellii</i> LMG 24682        | GCF_000820085.1  | Human, Wound                         | 4.19      | 3,922 | 3,717    | 633415  |
| <i>A. schubertii</i> strain WL1483    | GCF_001447335.1  | Snakehead Fish                       | 4.4       | 4,268 | 3,854    | 652     |
| <i>A. simiae</i> CIP 107798           | GCF_000820125.1  | Healthy monkey                       | 3.99      | 3,815 | 3,551    | 218936  |
| <i>A. sobria</i> CECT 4245            | GCF_000820145.1  | Fish                                 | 4.68      | 4,294 | 4,096    | 646     |
| <i>A. taiwanensis</i> LMG 24683       | GCF_000820165.1  | Human, Wound                         | 4.25      | 3,975 | 3,751    | 633417  |
| <i>A. tecta</i> CECT 7082             | GCF_000820185.1  | Human, Stool                         | 4.76      | 4,394 | 4,177    | 324617  |
| <i>A. veronii</i> CECT 4257           | GCF_000820225.1  | Human, Sputum                        | 4.52      | 4,179 | 3,999    | 197701  |
