# Supplementary material for: Comprehensive Analysis Reveals the Evolution and Pathogenicity of Aeromonas, Viewed from Both Single Isolated Species and Microbial Communities
Source: PubMed Central journal article supplement (PMC6811364; doi:10.1128/msystems.00252-19), 2019-10-22
Supplement: mSystems.00252-19-st002.pdf [file mSystems.00252-19-st002.pdf]

Supplementary Table S2. Summary of homologous gene identified for 29 *Aeromonas* strains by OrthoMCL.

| Strain                                | Total gene families | Total gene counts | Core families | Core gene counts | Accessory families | Accessory gene counts | Unique families | Unique gene counts |
|---------------------------------------|---------------------|-------------------|---------------|------------------|--------------------|-----------------------|-----------------|--------------------|
| Total                                 | 10,144              | 113,003           | 1,645         | 48,085           | 4,825              | 61,132                | 3,674           | 3,786              |
| <i>A. hydrophila</i> ATCC 7966        | 4,072               | 4,119             | 1,645         | 1,658            | 2,345              | 2,378                 | 82              | 83                 |
| <i>A. media</i> WS                    | 3,718               | 3,833             | 1,645         | 1,659            | 1,924              | 2,008                 | 149             | 166                |
| <i>A. dhakensis</i> AAK1              | 4,075               | 4,124             | 1,645         | 1,658            | 2,353              | 2,388                 | 77              | 78                 |
| <i>A. molluscorum</i> 848             | 3,511               | 3,552             | 1,645         | 1,659            | 1,757              | 1,783                 | 109             | 110                |
| <i>A. finlandiensis</i> 4287D         | 3,981               | 4,025             | 1,645         | 1,660            | 2,216              | 2,244                 | 120             | 121                |
| <i>A. lacus</i> AE122                 | 3,807               | 3,838             | 1,645         | 1,657            | 2,079              | 2,098                 | 83              | 83                 |
| <i>A. allosaccharophila</i> CECT 4199 | 3,951               | 4,035             | 1,645         | 1,660            | 2,127              | 2,186                 | 179             | 189                |
| <i>A. australiensis</i> CECT 8023     | 3,543               | 3,572             | 1,645         | 1,655            | 1,775              | 1,793                 | 123             | 124                |
| <i>A. bestiarum</i> CECT 4227         | 3,984               | 4,023             | 1,645         | 1,657            | 2,260              | 2,286                 | 79              | 80                 |
| <i>A. bivalvium</i> CECT 7113         | 3,654               | 3,694             | 1,645         | 1,657            | 1,932              | 1,959                 | 77              | 78                 |
| <i>A. caviae</i> CECT 838             | 3,820               | 3,857             | 1,645         | 1,659            | 2,099              | 2,122                 | 76              | 76                 |
| <i>A. diversa</i> CECT 4254           | 3,549               | 3,590             | 1,645         | 1,657            | 1,784              | 1,809                 | 120             | 124                |
| <i>A. encheleia</i> CECT 4342         | 3,873               | 3,913             | 1,645         | 1,661            | 2,142              | 2,165                 | 86              | 87                 |
| <i>A. enteropelogenes</i> CECT 4487   | 3,858               | 3,895             | 1,645         | 1,658            | 2,084              | 2,107                 | 129             | 130                |
| <i>A. eucrenophila</i> CECT 4224      | 3,897               | 3,934             | 1,645         | 1,657            | 2,152              | 2,177                 | 100             | 100                |
| <i>A. fluvialis</i> LMG 24681         | 3,376               | 3,415             | 1,645         | 1,654            | 1,575              | 1,603                 | 156             | 158                |
| <i>A. jandaei</i> CECT 4228           | 3,902               | 3,948             | 1,645         | 1,658            | 2,176              | 2,209                 | 81              | 81                 |
| <i>A. piscicola</i> LMG 24783         | 4,342               | 4,508             | 1,645         | 1,660            | 2,488              | 2,624                 | 209             | 224                |
| <i>A. popoffii</i> CIP 105493         | 3,962               | 4,071             | 1,645         | 1,657            | 2,080              | 2,173                 | 237             | 241                |
| <i>A. rivuli</i> DSM 22539            | 3,938               | 4,006             | 1,645         | 1,659            | 2,026              | 2,062                 | 267             | 285                |
| <i>A. sanarellii</i> LMG 24682        | 3,606               | 3,633             | 1,645         | 1,657            | 1,911              | 1,925                 | 50              | 51                 |
| <i>A. simiae</i> CIP 107798           | 3,452               | 3,518             | 1,645         | 1,657            | 1,596              | 1,638                 | 211             | 223                |
| <i>A. sobria</i> CECT 4245            | 3,965               | 4,057             | 1,645         | 1,658            | 2,166              | 2,241                 | 154             | 158                |
| <i>A. taiwanensis</i> LMG 24683       | 3,650               | 3,684             | 1,645         | 1,661            | 1,932              | 1,950                 | 73              | 73                 |
| <i>A. tecta</i> CECT 7082             | 4,082               | 4,121             | 1,645         | 1,659            | 2,326              | 2,351                 | 111             | 111                |
| <i>A. veronii</i> CECT 4257           | 3,906               | 3,955             | 1,645         | 1,663            | 2,184              | 2,215                 | 77              | 77                 |
| <i>A. schubertii</i> strain WL1483    | 3,736               | 3,813             | 1,645         | 1,652            | 1,918              | 1,982                 | 173             | 179                |
| <i>A. salmonicida</i> ATCC 33658      | 3,996               | 4,061             | 1,645         | 1,657            | 2,177              | 2,222                 | 174             | 182                |
| <i>A. aquatica</i> MX16A              | 4,154               | 4,209             | 1,645         | 1,661            | 2,397              | 2,434                 | 112             | 114                |
