# Supplementary material for: Comprehensive Analysis Reveals the Evolution and Pathogenicity of Aeromonas, Viewed from Both Single Isolated Species and Microbial Communities
Source: PubMed Central journal article supplement (PMC6811364; doi:10.1128/msystems.00252-19), 2019-10-22
Supplement: mSystems.00252-19-st003.pdf [file mSystems.00252-19-st003.pdf]

Supplementary Table S3. Summary of 16 predicted genus-specific genes of *Aeromonas*, 50 predicted horizontally transferred genes in core genome and 46 predicted virulence genes present in all 29 strains.

| Gene family           | Gene symbol     | Genome type | Type               | Category                                |
|-----------------------|-----------------|-------------|--------------------|-----------------------------------------|
| Aeromonas_cluster634  | <i>AHA_1282</i> | Core        | Aeromonas-specific | Specific for the genus <i>Aeromonas</i> |
| Aeromonas_cluster20   | <i>AHA_3819</i> | Core        | Aeromonas-specific | Specific for the genus <i>Aeromonas</i> |
| Aeromonas_cluster956  | <i>AHA_2198</i> | Core        | Aeromonas-specific | Specific for the genus <i>Aeromonas</i> |
| Aeromonas_cluster717  | <i>AHA_1552</i> | Core        | Aeromonas-specific | Specific for the genus <i>Aeromonas</i> |
| Aeromonas_cluster160  | <i>AHA_0150</i> | Core        | Aeromonas-specific | Specific for the genus <i>Aeromonas</i> |
| Aeromonas_cluster693  | <i>AHA_1510</i> | Core        | Aeromonas-specific | Specific for the genus <i>Aeromonas</i> |
| Aeromonas_cluster354  | <i>AHA_0627</i> | Core        | Aeromonas-specific | Specific for the genus <i>Aeromonas</i> |
| Aeromonas_cluster311  | <i>AHA_0510</i> | Core        | Aeromonas-specific | Specific for the genus <i>Aeromonas</i> |
| Aeromonas_cluster281  | <i>AHA_0437</i> | Core        | Aeromonas-specific | Specific for the genus <i>Aeromonas</i> |
| Aeromonas_cluster534  | <i>AHA_1006</i> | Core        | Aeromonas-specific | Specific for the genus <i>Aeromonas</i> |
| Aeromonas_cluster690  | <i>AHA_1499</i> | Core        | Aeromonas-specific | Specific for the genus <i>Aeromonas</i> |
| Aeromonas_cluster1612 | <i>AHA_4060</i> | Core        | Aeromonas-specific | Specific for the genus <i>Aeromonas</i> |
| Aeromonas_cluster1324 | <i>AHA_3339</i> | Core        | Aeromonas-specific | Specific for the genus <i>Aeromonas</i> |
| Aeromonas_cluster356  | <i>AHA_0638</i> | Core        | Aeromonas-specific | Specific for the genus <i>Aeromonas</i> |
| Aeromonas_cluster1415 | <i>AHA_3607</i> | Core        | Aeromonas-specific | Specific for the genus <i>Aeromonas</i> |
| Aeromonas_cluster426  | <i>AHA_0787</i> | Core        | Aeromonas-specific | Specific for the genus <i>Aeromonas</i> |
| Aeromonas_cluster1058 | <i>AHA_2472</i> | Core        | HGT                | Predicted horizontal transfer gene      |
| Aeromonas_cluster1072 | <i>AHA_2580</i> | Core        | HGT                | Predicted horizontal transfer gene      |
| Aeromonas_cluster1084 | <i>AHA_2616</i> | Core        | HGT                | Predicted horizontal transfer gene      |
| Aeromonas_cluster1091 | <i>AHA_2629</i> | Core        | HGT                | Predicted horizontal transfer gene      |
| Aeromonas_cluster1096 | <i>nth</i>      | Core        | HGT                | Predicted horizontal transfer gene      |
| Aeromonas_cluster111  | <i>AHA_0046</i> | Core        | HGT                | Predicted horizontal transfer gene      |
| Aeromonas_cluster1215 | <i>crr</i>      | Core        | HGT                | Predicted horizontal transfer gene      |
| Aeromonas_cluster1231 | <i>AHA_3118</i> | Core        | HGT                | Predicted horizontal transfer gene      |
| Aeromonas_cluster1234 | <i>gshB</i>     | Core        | HGT                | Predicted horizontal transfer gene      |
| Aeromonas_cluster1255 | <i>rpe</i>      | Core        | HGT                | Predicted horizontal transfer gene      |
| Aeromonas_cluster1310 | <i>AHA_3322</i> | Core        | HGT                | Predicted horizontal transfer gene      |
| Aeromonas_cluster1313 | <i>AHA_3325</i> | Core        | HGT                | Predicted horizontal transfer gene      |
| Aeromonas_cluster1322 | <i>glyA</i>     | Core        | HGT                | Predicted horizontal transfer gene      |
| Aeromonas_cluster1342 | <i>mogA</i>     | Core        | HGT                | Predicted horizontal transfer gene      |
| Aeromonas_cluster1419 | <i>gap-2</i>    | Core        | HGT                | Predicted horizontal transfer gene      |
| Aeromonas_cluster1457 | <i>AHA_3698</i> | Core        | HGT                | Predicted horizontal transfer gene      |
| Aeromonas_cluster147  | <i>glyQ</i>     | Core        | HGT                | Predicted horizontal transfer gene      |
| Aeromonas_cluster1507 | <i>AHA_3830</i> | Core        | HGT                | Predicted horizontal transfer gene      |
| Aeromonas_cluster1551 | <i>rpsI</i>     | Core        | HGT                | Predicted horizontal transfer gene      |
| Aeromonas_cluster1552 | <i>rplM</i>     | Core        | HGT                | Predicted horizontal transfer gene      |
| Aeromonas_cluster1597 | <i>rplA</i>     | Core        | HGT                | Predicted horizontal transfer gene      |
| Aeromonas_cluster1622 | <i>pntB</i>     | Core        | HGT                | Predicted horizontal transfer gene      |
| Aeromonas_cluster1623 | <i>pntA</i>     | Core        | HGT                | Predicted horizontal transfer gene      |
| Aeromonas_cluster1642 | <i>potI</i>     | Core        | HGT                | Predicted horizontal transfer gene      |
| Aeromonas_cluster1654 | <i>AHA_4189</i> | Core        | HGT                | Predicted horizontal transfer gene      |
| Aeromonas_cluster1656 | <i>AHA_4196</i> | Core        | HGT                | Predicted horizontal transfer gene      |
| Aeromonas_cluster1677 | <i>kbl</i>      | Core        | HGT                | Predicted horizontal transfer gene      |
| Aeromonas_cluster1678 | <i>tdh</i>      | Core        | HGT                | Predicted horizontal transfer gene      |
| Aeromonas_cluster1693 | <i>atpE</i>     | Core        | HGT                | Predicted horizontal transfer gene      |
| Aeromonas_cluster241  | <i>rplD</i>     | Core        | HGT                | Predicted horizontal transfer gene      |
| Aeromonas_cluster246  | <i>rpsC</i>     | Core        | HGT                | Predicted horizontal transfer gene      |
| Aeromonas_cluster249  | <i>rpsQ</i>     | Core        | HGT                | Predicted horizontal transfer gene      |
| Aeromonas_cluster252  | <i>rplE</i>     | Core        | HGT                | Predicted horizontal transfer gene      |
| Aeromonas_cluster314  | <i>menB</i>     | Core        | HGT                | Predicted horizontal transfer gene      |
| Aeromonas_cluster32   | <i>rfbB</i>     | Core        | HGT                | Predicted horizontal transfer gene      |
| Aeromonas_cluster341  | <i>metJ</i>     | Core        | HGT                | Predicted horizontal transfer gene      |
| Aeromonas_cluster410  | <i>xenB</i>     | Core        | HGT                | Predicted horizontal transfer gene      |

|                       |                  |      |                   |                                    |
|-----------------------|------------------|------|-------------------|------------------------------------|
| Aeromonas_cluster411  | <i>AHA_0738</i>  | Core | HGT               | Predicted horizontal transfer gene |
| Aeromonas_cluster412  | <i>AHA_0739</i>  | Core | HGT               | Predicted horizontal transfer gene |
| Aeromonas_cluster501  | <i>hfq</i>       | Core | HGT               | Predicted horizontal transfer gene |
| Aeromonas_cluster506  | <i>rpmA</i>      | Core | HGT               | Predicted horizontal transfer gene |
| Aeromonas_cluster526  | <i>crp</i>       | Core | HGT               | Predicted horizontal transfer gene |
| Aeromonas_cluster54   | <i>zntA</i>      | Core | HGT               | Predicted horizontal transfer gene |
| Aeromonas_cluster664  | <i>AHA_1404</i>  | Core | HGT               | Predicted horizontal transfer gene |
| Aeromonas_cluster732  | <i>gmhA</i>      | Core | HGT               | Predicted horizontal transfer gene |
| Aeromonas_cluster794  | <i>AHA_1732</i>  | Core | HGT               | Predicted horizontal transfer gene |
| Aeromonas_cluster813  | <i>fdx</i>       | Core | HGT               | Predicted horizontal transfer gene |
| Aeromonas_cluster843  | <i>AHA_1821</i>  | Core | HGT               | Predicted horizontal transfer gene |
| Aeromonas_cluster852  | <i>lrp</i>       | Core | HGT               | Predicted horizontal transfer gene |
| Aeromonas_cluster890  | <i>sucC</i>      | Core | HGT               | Predicted horizontal transfer gene |
| Aeromonas_cluster1135 | <i>nueA</i>      | Core | Polar flagella    | Predicted virulence gene           |
| Aeromonas_cluster1160 | <i>fleR/flrC</i> | Core | Polar flagella    | Predicted virulence gene           |
| Aeromonas_cluster1161 | <i>fleS/flrB</i> | Core | Polar flagella    | Predicted virulence gene           |
| Aeromonas_cluster1165 | <i>flgK</i>      | Core | Polar flagella    | Predicted virulence gene           |
| Aeromonas_cluster1166 | <i>flgJ</i>      | Core | Polar flagella    | Predicted virulence gene           |
| Aeromonas_cluster1167 | <i>flgI</i>      | Core | Polar flagella    | Predicted virulence gene           |
| Aeromonas_cluster1168 | <i>flgH</i>      | Core | Polar flagella    | Predicted virulence gene           |
| Aeromonas_cluster1169 | <i>flgG</i>      | Core | Polar flagella    | Predicted virulence gene           |
| Aeromonas_cluster1170 | <i>flgF</i>      | Core | Polar flagella    | Predicted virulence gene           |
| Aeromonas_cluster1171 | <i>flgE</i>      | Core | Polar flagella    | Predicted virulence gene           |
| Aeromonas_cluster1172 | <i>flgD</i>      | Core | Polar flagella    | Predicted virulence gene           |
| Aeromonas_cluster1173 | <i>flgC</i>      | Core | Polar flagella    | Predicted virulence gene           |
| Aeromonas_cluster1174 | <i>flgB</i>      | Core | Polar flagella    | Predicted virulence gene           |
| Aeromonas_cluster1175 | <i>cheR-3</i>    | Core | Polar flagella    | Predicted virulence gene           |
| Aeromonas_cluster1176 | <i>cheV</i>      | Core | Polar flagella    | Predicted virulence gene           |
| Aeromonas_cluster1177 | <i>flgM</i>      | Core | Polar flagella    | Predicted virulence gene           |
| Aeromonas_cluster1178 | <i>flgN</i>      | Core | Polar flagella    | Predicted virulence gene           |
| Aeromonas_cluster1259 | <i>tapP</i>      | Core | Tap type IV pili  | Predicted virulence gene           |
| Aeromonas_cluster1260 | <i>tapO</i>      | Core | Tap type IV pili  | Predicted virulence gene           |
| Aeromonas_cluster1261 | <i>tapM</i>      | Core | Tap type IV pili  | Predicted virulence gene           |
| Aeromonas_cluster329  | <i>exeC</i>      | Core | T2SS              | Predicted virulence gene           |
| Aeromonas_cluster330  | <i>exeD</i>      | Core | T2SS              | Predicted virulence gene           |
| Aeromonas_cluster331  | <i>exeE</i>      | Core | T2SS              | Predicted virulence gene           |
| Aeromonas_cluster332  | <i>exeF</i>      | Core | T2SS              | Predicted virulence gene           |
| Aeromonas_cluster333  | <i>exeG</i>      | Core | T2SS              | Predicted virulence gene           |
| Aeromonas_cluster334  | <i>exeH</i>      | Core | T2SS              | Predicted virulence gene           |
| Aeromonas_cluster335  | <i>exeI</i>      | Core | T2SS              | Predicted virulence gene           |
| Aeromonas_cluster336  | <i>exeJ</i>      | Core | T2SS              | Predicted virulence gene           |
| Aeromonas_cluster337  | <i>exeK</i>      | Core | T2SS              | Predicted virulence gene           |
| Aeromonas_cluster338  | <i>exeM</i>      | Core | T2SS              | Predicted virulence gene           |
| Aeromonas_cluster339  | <i>exeN</i>      | Core | T2SS              | Predicted virulence gene           |
| Aeromonas_cluster367  | <i>motX</i>      | Core | Polar flagella    | Predicted virulence gene           |
| Aeromonas_cluster519  | <i>hutB</i>      | Core | Iron uptake       | Predicted virulence gene           |
| Aeromonas_cluster520  | <i>hutX</i>      | Core | Iron uptake       | Predicted virulence gene           |
| Aeromonas_cluster521  | <i>hutZ</i>      | Core | Iron uptake       | Predicted virulence gene           |
| Aeromonas_cluster522  | <i>ASA_3331</i>  | Core | Iron uptake       | Predicted virulence gene           |
| Aeromonas_cluster523  | <i>ASA_3330</i>  | Core | Iron uptake       | Predicted virulence gene           |
| Aeromonas_cluster62   | <i>mshJ</i>      | Core | MSHA type IV pili | Predicted virulence gene           |
| Aeromonas_cluster63   | <i>mshI</i>      | Core | MSHA type IV pili | Predicted virulence gene           |
| Aeromonas_cluster653  | <i>cheB-2</i>    | Core | Polar flagella    | Predicted virulence gene           |
| Aeromonas_cluster654  | <i>pomB</i>      | Core | Polar flagella    | Predicted virulence gene           |
| Aeromonas_cluster655  | <i>B565_1123</i> | Core | Polar flagella    | Predicted virulence gene           |
| Aeromonas_cluster656  | <i>cheW</i>      | Core | Polar flagella    | Predicted virulence gene           |
| Aeromonas_cluster782  | <i>flaG</i>      | Core | Polar flagella    | Predicted virulence gene           |
| Aeromonas_cluster7    | <i>flaB</i>      | Core | Polar flagella    | Predicted virulence gene           |

Aeromonas\_cluster818

*tapF*

Core

Tap type IV pili

Predicted virulence gene

---
