# Supplementary material for: Comprehensive Analysis Reveals the Evolution and Pathogenicity of Aeromonas, Viewed from Both Single Isolated Species and Microbial Communities
Source: PubMed Central journal article supplement (PMC6811364; doi:10.1128/msystems.00252-19), 2019-10-22
Supplement: mSystems.00252-19-st004.pdf [file mSystems.00252-19-st004.pdf]

Supplementary Table S4. Predicted 167 horizontally transferred genes mediated by MGEs.

| Gene symbol           | Mobile Element     | Genome Type | Strain                                                                                                                                                                                                                                                                                                                                                                                  |
|-----------------------|--------------------|-------------|-----------------------------------------------------------------------------------------------------------------------------------------------------------------------------------------------------------------------------------------------------------------------------------------------------------------------------------------------------------------------------------------|
| <i>BN1125_RS13630</i> | Insertion sequence | Accessory   | <i>A. allosaccharophila</i> CECT 4199                                                                                                                                                                                                                                                                                                                                                   |
| <i>BN1125_RS09275</i> | Insertion sequence | Accessory   | <i>A. allosaccharophila</i> CECT 4199                                                                                                                                                                                                                                                                                                                                                   |
| <i>BN1115_RS19170</i> | Insertion sequence | Accessory   | <i>A. allosaccharophila</i> CECT 4199                                                                                                                                                                                                                                                                                                                                                   |
| <i>BN1125_RS13625</i> | Insertion sequence | Accessory   | <i>A. allosaccharophila</i> CECT 4199, <i>A. fluvialis</i> LMG 24681, <i>A. rivuli</i> DSM 22539, <i>A. simiae</i> CIP 107798                                                                                                                                                                                                                                                           |
| <i>BN1115_RS09810</i> | Insertion sequence | Accessory   | <i>A. allosaccharophila</i> CECT 4199, <i>A. popoffii</i> CIP 105493, <i>A. salmonicida</i> ATCC 33658                                                                                                                                                                                                                                                                                  |
| <i>flhA</i>           | Insertion sequence | Accessory   | <i>A. australiensis</i> CECT 8023, <i>A. popoffii</i> CIP 105493, <i>A. bivalvium</i> CECT 7113, <i>A. encheleia</i> CECT 4342, <i>A. enteropelogenes</i> CECT 4487, <i>A. piscicola</i> LMG 24783, <i>A. popoffii</i> CIP 105493, <i>A. rivuli</i> DSM 22539, <i>A. simiae</i> CIP 107798, <i>A. sobria</i> CECT 4245, <i>A. veronii</i> CECT 4257, <i>A. schubertii</i> strain WL1483 |
| <i>BN1119_RS17070</i> | Insertion sequence | Accessory   | <i>A. bivalvium</i> CECT 7113, <i>A. encheleia</i> CECT 4342, <i>A. enteropelogenes</i> CECT 4487, <i>A. piscicola</i> LMG 24783, <i>A. popoffii</i> CIP 105493, <i>A. simiae</i> CIP 107798, <i>A. sobria</i> CECT 4245, <i>A. veronii</i> CECT 4257, <i>A. schubertii</i> strain WL1483                                                                                               |
| <i>BN1119_RS00140</i> | Insertion sequence | Accessory   | <i>A. dhakensis</i> AAK1, <i>A. allosaccharophila</i> CECT 4199, <i>A. bestiarum</i> CECT 4227, <i>A. bivalvium</i> CECT 7113, <i>A. caviae</i> CECT 838, <i>A. diversa</i> CECT 4254, <i>A. jandaei</i> CECT 4228, <i>A. sanarellii</i> LMG 24682, <i>A. sobria</i> CECT 4245, <i>A. veronii</i> CECT 4257, <i>A. schubertii</i> strain WL1483                                         |
| <i>AQU_RS21120</i>    | Insertion sequence | Accessory   | <i>A. dhakensis</i> AAK1, <i>A. allosaccharophila</i> CECT 4199, <i>A. bivalvium</i> CECT 7113, <i>A. enteropelogenes</i> CECT 4487, <i>A. sobria</i> CECT 4245, <i>A. taiwanensis</i> LMG 24683, <i>A. veronii</i> CECT 4257                                                                                                                                                           |
| <i>BN1125_RS05635</i> | Insertion sequence | Accessory   | <i>A. finlandiensis</i> 4287D                                                                                                                                                                                                                                                                                                                                                           |
| <i>LD28_RS0121450</i> | Insertion sequence | Accessory   | <i>A. media</i> WS                                                                                                                                                                                                                                                                                                                                                                      |
| <i>BN1125_RS07670</i> | Insertion sequence | Accessory   | <i>A. media</i> WS                                                                                                                                                                                                                                                                                                                                                                      |
| <i>BN1125_RS10465</i> | Insertion sequence | Accessory   | <i>A. media</i> WS, <i>A. allosaccharophila</i> CECT 4199, <i>A. australiensis</i> CECT 8023, <i>A. piscicola</i> LMG 24783                                                                                                                                                                                                                                                             |
| <i>B224_RS07790</i>   | Insertion sequence | Accessory   | <i>A. media</i> WS, <i>A. allosaccharophila</i> CECT 4199, <i>A. australiensis</i> CECT 8023, <i>A. schubertii</i> strain WL1483                                                                                                                                                                                                                                                        |
| <i>B224_RS17020</i>   | Insertion sequence | Accessory   | <i>A. media</i> WS, <i>A. australiensis</i> CECT 8023                                                                                                                                                                                                                                                                                                                                   |
| <i>B224_RS01930</i>   | Insertion sequence | Accessory   | <i>A. media</i> WS, <i>A. australiensis</i> CECT 8023, <i>A. popoffii</i> CIP 105493                                                                                                                                                                                                                                                                                                    |
| <i>B224_RS00725</i>   | Insertion sequence | Accessory   | <i>A. media</i> WS, <i>A. diversa</i> CECT 4254, <i>A. schubertii</i> strain WL1483                                                                                                                                                                                                                                                                                                     |
| <i>B224_RS01095</i>   | Insertion sequence | Accessory   | <i>A. media</i> WS, <i>A. fluvialis</i> LMG 24681, <i>A. popoffii</i> CIP 105493, <i>A. simiae</i> CIP 107798                                                                                                                                                                                                                                                                           |
| <i>BN1125_RS06775</i> | Insertion sequence | Accessory   | <i>A. molluscorum</i> 848, <i>A. bestiarum</i> CECT 4227, <i>A. bivalvium</i> CECT 7113, <i>A. simiae</i> CIP 107798, <i>A. taiwanensis</i> LMG 24683                                                                                                                                                                                                                                   |
| <i>G113_RS12770</i>   | Insertion sequence | Accessory   | <i>A. schubertii</i> strain WL1483                                                                                                                                                                                                                                                                                                                                                      |
| <i>AHA_1119</i>       | Insertion sequence | Accessory   | <i>A. schubertii</i> strain WL1483                                                                                                                                                                                                                                                                                                                                                      |
| <i>WL1483_RS00020</i> | Insertion sequence | Accessory   | <i>A. schubertii</i> strain WL1483                                                                                                                                                                                                                                                                                                                                                      |
| <i>BN1125_RS13620</i> | Insertion sequence | Accessory   | <i>A. simiae</i> CIP 107798                                                                                                                                                                                                                                                                                                                                                             |

|                       |         |           |                                                                                                                                                                                                                                                                                   |
|-----------------------|---------|-----------|-----------------------------------------------------------------------------------------------------------------------------------------------------------------------------------------------------------------------------------------------------------------------------------|
| <i>ampC</i>           | Plasmid | Accessory | <i>A. allosaccharophila</i> CECT 4199, <i>A. bestiarum</i> CECT 4227, <i>A. piscicola</i> LMG 24783, <i>A. sanarellii</i> LMG 24682                                                                                                                                               |
| <i>BOQ57_RS11335</i>  | Plasmid | Accessory | <i>A. aquatica</i> MX16A                                                                                                                                                                                                                                                          |
| <i>BN1117_RS12680</i> | Plasmid | Accessory | <i>A. australiensis</i> CECT 8023                                                                                                                                                                                                                                                 |
| <i>BN1117_RS08530</i> | Plasmid | Accessory | <i>A. australiensis</i> CECT 8023, <i>A. bivalvium</i> CECT 7113                                                                                                                                                                                                                  |
| <i>BN1117_RS12685</i> | Plasmid | Accessory | <i>A. australiensis</i> CECT 8023, <i>A. jandaei</i> CECT 4228                                                                                                                                                                                                                    |
| <i>BN1117_RS03145</i> | Plasmid | Accessory | <i>A. australiensis</i> CECT 8023, <i>A. salmonicida</i> ATCC 33658                                                                                                                                                                                                               |
| <i>AHA_0625</i>       | Plasmid | Accessory | <i>A. bivalvium</i> CECT 7113                                                                                                                                                                                                                                                     |
| <i>BN1119_RS14860</i> | Plasmid | Accessory | <i>A. bivalvium</i> CECT 7113                                                                                                                                                                                                                                                     |
| <i>BN1119_RS11040</i> | Plasmid | Accessory | <i>A. bivalvium</i> CECT 7113                                                                                                                                                                                                                                                     |
| <i>AHA_0214</i>       | Plasmid | Accessory | <i>A. bivalvium</i> CECT 7113, <i>A. caviae</i> CECT 838, <i>A. eucrenophila</i> CECT 4224, <i>A. sanarellii</i> LMG 24682, <i>A. taiwanensis</i> LMG 24683                                                                                                                       |
| <i>BN1119_RS17945</i> | Plasmid | Accessory | <i>A. bivalvium</i> CECT 7113, <i>A. salmonicida</i> ATCC 33658                                                                                                                                                                                                                   |
| <i>AHA_0037</i>       | Plasmid | Accessory | <i>A. dhakensis</i> AAK1                                                                                                                                                                                                                                                          |
| <i>AQU_RS18805</i>    | Plasmid | Accessory | <i>A. dhakensis</i> AAK1, <i>A. allosaccharophila</i> CECT 4199, <i>A. simiae</i> CIP 107798, <i>A. aquatica</i> MX16A                                                                                                                                                            |
| <i>AQU_RS18795</i>    | Plasmid | Accessory | <i>A. dhakensis</i> AAK1, <i>A. aquatica</i> MX16A                                                                                                                                                                                                                                |
| <i>AQU_RS18815</i>    | Plasmid | Accessory | <i>A. dhakensis</i> AAK1, <i>A. molluscorum</i> 848, <i>A. aquatica</i> MX16A                                                                                                                                                                                                     |
| <i>AQU_RS18845</i>    | Plasmid | Accessory | <i>A. dhakensis</i> AAK1, <i>A. simiae</i> CIP 107798, <i>A. aquatica</i> MX16A                                                                                                                                                                                                   |
| <i>AQU_RS18825</i>    | Plasmid | Accessory | <i>A. dhakensis</i> AAK1, <i>A. simiae</i> CIP 107798, <i>A. aquatica</i> MX16A                                                                                                                                                                                                   |
| <i>AQU_RS18840</i>    | Plasmid | Accessory | <i>A. dhakensis</i> AAK1, <i>A. simiae</i> CIP 107798, <i>A. aquatica</i> MX16A                                                                                                                                                                                                   |
| <i>AQU_RS18810</i>    | Plasmid | Accessory | <i>A. dhakensis</i> AAK1, <i>A. simiae</i> CIP 107798, <i>A. aquatica</i> MX16A                                                                                                                                                                                                   |
| <i>AHA_2243</i>       | Plasmid | Accessory | <i>A. finlandiensis</i> 4287D, <i>A. allosaccharophila</i> CECT 4199, <i>A. piscicola</i> LMG 24783, <i>A. sobria</i> CECT 4245, <i>A. veronii</i> CECT 4257, <i>A. salmonicida</i> ATCC 33658                                                                                    |
| <i>AHA_3133</i>       | Plasmid | Accessory | <i>A. finlandiensis</i> 4287D, <i>A. lacus</i> AE122, <i>A. allosaccharophila</i> CECT 4199, <i>A. encheleia</i> CECT 4342, <i>A. jandaei</i> CECT 4228, <i>A. piscicola</i> LMG 24783, <i>A. sobria</i> CECT 4245, <i>A. veronii</i> CECT 4257, <i>A. salmonicida</i> ATCC 33658 |
| <i>fliI</i>           | Plasmid | Accessory | <i>A. finlandiensis</i> 4287D, <i>A. lacus</i> AE122, <i>A. diversa</i> CECT 4254, <i>A. encheleia</i> CECT 4342, <i>A. jandaei</i> CECT 4228, <i>A. piscicola</i> LMG 24783, <i>A. tecta</i> CECT 7082, <i>A. schubertii</i> strain WL1483                                       |
| <i>B224_RS04160</i>   | Plasmid | Accessory | <i>A. media</i> WS, <i>A. allosaccharophila</i> CECT 4199, <i>A. bivalvium</i> CECT 7113, <i>A. schubertii</i> strain WL1483, <i>A. aquatica</i> MX16A                                                                                                                            |
| <i>B224_RS17435</i>   | Plasmid | Accessory | <i>A. media</i> WS, <i>A. allosaccharophila</i> CECT 4199, <i>A. fluvialis</i> LMG 24681, <i>A. aquatica</i> MX16A                                                                                                                                                                |
| <i>B224_RS06355</i>   | Plasmid | Accessory | <i>A. media</i> WS, <i>A. aquatica</i> MX16A                                                                                                                                                                                                                                      |
| <i>AHA_3130</i>       | Plasmid | Accessory | <i>A. media</i> WS, <i>A. caviae</i> CECT 838, <i>A. encheleia</i> CECT 4342, <i>A. eucrenophila</i> CECT 4224, <i>A. sanarellii</i> LMG 24682, <i>A. taiwanensis</i> LMG 24683                                                                                                   |

|                |          |           |                                                                                                                                                                                                            |
|----------------|----------|-----------|------------------------------------------------------------------------------------------------------------------------------------------------------------------------------------------------------------|
| B224_RS11130   | Plasmid  | Accessory | <i>A. media</i> WS, <i>A. dhakensis</i> AAK1, <i>A. allosaccharophila</i> CECT 4199, <i>A. simiae</i> CIP 107798, <i>A. aquatica</i> MX16A                                                                 |
| B224_RS04110   | Plasmid  | Accessory | <i>A. media</i> WS, <i>A. dhakensis</i> AAK1, <i>A. molluscorum</i> 848, <i>A. encheleia</i> CECT 4342, <i>A. rivuli</i> DSM 22539, <i>A. aquatica</i> MX16A                                               |
| B224_RS11985   | Plasmid  | Accessory | <i>A. media</i> WS, <i>A. simiae</i> CIP 107798, <i>A. salmonicida</i> ATCC 33658, <i>A. aquatica</i> MX16A                                                                                                |
| G113_RS12775   | Plasmid  | Accessory | <i>A. molluscorum</i> 848, <i>A. bestiarum</i> CECT 4227, <i>A. bivalvium</i> CECT 7113, <i>A. caviae</i> CECT 838, <i>A. simiae</i> CIP 107798, <i>A. taiwanensis</i> LMG 24683, <i>A. aquatica</i> MX16A |
| BN1128_RS22125 | Plasmid  | Accessory | <i>A. piscicola</i> LMG 24783                                                                                                                                                                              |
| BN1128_RS22830 | Plasmid  | Accessory | <i>A. piscicola</i> LMG 24783, <i>A. rivuli</i> DSM 22539, <i>A. simiae</i> CIP 107798, <i>A. salmonicida</i> ATCC 33658, <i>A. aquatica</i> MX16A                                                         |
| AHA_4095       | Plasmid  | Accessory | <i>A. rivuli</i> DSM 22539                                                                                                                                                                                 |
| AXW79_RS08025  | Plasmid  | Accessory | <i>A. salmonicida</i> ATCC 33658                                                                                                                                                                           |
| AXW79_RS18750  | Plasmid  | Accessory | <i>A. salmonicida</i> ATCC 33658                                                                                                                                                                           |
| AXW79_RS18755  | Plasmid  | Accessory | <i>A. salmonicida</i> ATCC 33658                                                                                                                                                                           |
| BN1134_RS03915 | Plasmid  | Accessory | <i>A. simiae</i> CIP 107798                                                                                                                                                                                |
| BN1134_RS03975 | Plasmid  | Accessory | <i>A. simiae</i> CIP 107798                                                                                                                                                                                |
| BN1134_RS03955 | Plasmid  | Accessory | <i>A. simiae</i> CIP 107798                                                                                                                                                                                |
| BN1134_RS04020 | Plasmid  | Accessory | <i>A. simiae</i> CIP 107798                                                                                                                                                                                |
| BN1134_RS04005 | Plasmid  | Accessory | <i>A. simiae</i> CIP 107798, <i>A. aquatica</i> MX16A                                                                                                                                                      |
| BN1134_RS04025 | Plasmid  | Accessory | <i>A. simiae</i> CIP 107798, <i>A. aquatica</i> MX16A                                                                                                                                                      |
| BN1120_RS15340 | Prophage | Accessory | <i>A. caviae</i> CECT 838                                                                                                                                                                                  |
| AQU_RS20380    | Prophage | Accessory | <i>A. dhakensis</i> AAK1                                                                                                                                                                                   |
| AQU_RS20290    | Prophage | Accessory | <i>A. dhakensis</i> AAK1, <i>A. encheleia</i> CECT 4342, <i>A. piscicola</i> LMG 24783                                                                                                                     |
| AQU_RS20365    | Prophage | Accessory | <i>A. dhakensis</i> AAK1, <i>A. eucrenophila</i> CECT 4224                                                                                                                                                 |
| AQU_RS20325    | Prophage | Accessory | <i>A. dhakensis</i> AAK1, <i>A. molluscorum</i> 848, <i>A. encheleia</i> CECT 4342, <i>A. enteropelogenes</i> CECT 4487, <i>A. eucrenophila</i> CECT 4224, <i>A. piscicola</i> LMG 24783                   |
| AQU_RS20305    | Prophage | Accessory | <i>A. dhakensis</i> AAK1, <i>A. molluscorum</i> 848, <i>A. encheleia</i> CECT 4342, <i>A. enteropelogenes</i> CECT 4487, <i>A. eucrenophila</i> CECT 4224, <i>A. piscicola</i> LMG 24783                   |
| AQU_RS20320    | Prophage | Accessory | <i>A. dhakensis</i> AAK1, <i>A. molluscorum</i> 848, <i>A. enteropelogenes</i> CECT 4487, <i>A. eucrenophila</i> CECT 4224, <i>A. piscicola</i> LMG 24783                                                  |
| BN1122_RS18270 | Prophage | Accessory | <i>A. encheleia</i> CECT 4342, <i>A. enteropelogenes</i> CECT 4487                                                                                                                                         |
| BN1122_RS18200 | Prophage | Accessory | <i>A. encheleia</i> CECT 4342, <i>A. eucrenophila</i> CECT 4224, <i>A. piscicola</i> LMG 24783                                                                                                             |
| BN1122_RS18195 | Prophage | Accessory | <i>A. encheleia</i> CECT 4342, <i>A. piscicola</i> LMG 24783                                                                                                                                               |
| BN1124_RS14960 | Prophage | Accessory | <i>A. eucrenophila</i> CECT 4224                                                                                                                                                                           |
| BN1124_RS14845 | Prophage | Accessory | <i>A. eucrenophila</i> CECT 4224                                                                                                                                                                           |
| AHA_2066       | Prophage | Accessory | <i>A. eucrenophila</i> CECT 4224                                                                                                                                                                           |
| BN1124_RS14770 | Prophage | Accessory | <i>A. eucrenophila</i> CECT 4224, <i>A. piscicola</i> LMG 24783                                                                                                                                            |
| AHA_1073       | Prophage | Accessory | <i>A. hydrophila</i> ATCC 7966, <i>A. dhakensis</i> AAK1, <i>A. fluvialis</i> LMG 24681, <i>A. sobria</i> CECT 4245, <i>A. taiwanensis</i> LMG 24683                                                       |

|                       |                    |           |                                                                                                                                                                                                         |
|-----------------------|--------------------|-----------|---------------------------------------------------------------------------------------------------------------------------------------------------------------------------------------------------------|
| <i>AHA_2061</i>       | Prophage           | Accessory | <i>A. hydrophila</i> ATCC 7966, <i>A. encheleia</i> CECT 4342, <i>A. enteropelogenes</i> CECT 4487, <i>A. piscicola</i> LMG 24783, <i>A. schubertii</i> strain WL1483, <i>A. salmonicida</i> ATCC 33658 |
| <i>BN1128_RS18880</i> | Prophage           | Accessory | <i>A. piscicola</i> LMG 24783                                                                                                                                                                           |
| <i>BN1128_RS18910</i> | Prophage           | Accessory | <i>A. piscicola</i> LMG 24783                                                                                                                                                                           |
| <i>BN1135_RS12830</i> | Prophage           | Accessory | <i>A. sobria</i> CECT 4245, <i>A. taiwanensis</i> LMG 24683                                                                                                                                             |
| <i>AQU_RS20240</i>    | Virus              | Accessory | <i>A. dhakensis</i> AAK1, <i>A. encheleia</i> CECT 4342, <i>A. eurenophila</i> CECT 4224, <i>A. piscicola</i> LMG 24783                                                                                 |
| <i>G113_RS02010</i>   | Virus              | Accessory | <i>A. molluscorum</i> 848                                                                                                                                                                               |
| <i>zntA</i>           | Plasmid            | core      | <i>A. molluscorum</i> 848                                                                                                                                                                               |
| <i>BOQ57_RS11435</i>  | Insertion sequence | Unique    | <i>A. aquatica</i> MX16A                                                                                                                                                                                |
| <i>BN1117_RS08205</i> | Insertion sequence | Unique    | <i>A. australiensis</i> CECT 8023                                                                                                                                                                       |
| <i>BN1117_RS18085</i> | Insertion sequence | Unique    | <i>A. australiensis</i> CECT 8023                                                                                                                                                                       |
| <i>BN1125_RS00280</i> | Insertion sequence | Unique    | <i>A. fluvialis</i> LMG 24681                                                                                                                                                                           |
| <i>B224_RS06475</i>   | Insertion sequence | Unique    | <i>A. media</i> WS                                                                                                                                                                                      |
| <i>B224_RS08155</i>   | Insertion sequence | Unique    | <i>A. media</i> WS                                                                                                                                                                                      |
| <i>B224_RS00325</i>   | Insertion sequence | Unique    | <i>A. media</i> WS                                                                                                                                                                                      |
| <i>B224_RS09735</i>   | Insertion sequence | Unique    | <i>A. media</i> WS                                                                                                                                                                                      |
| <i>B224_RS04085</i>   | Insertion sequence | Unique    | <i>A. media</i> WS                                                                                                                                                                                      |
| <i>B224_RS09740</i>   | Insertion sequence | Unique    | <i>A. media</i> WS                                                                                                                                                                                      |
| <i>BN1128_RS21995</i> | Insertion sequence | Unique    | <i>A. piscicola</i> LMG 24783                                                                                                                                                                           |
| <i>BN1128_RS06465</i> | Insertion sequence | Unique    | <i>A. piscicola</i> LMG 24783                                                                                                                                                                           |
| <i>BN1129_RS00195</i> | Insertion sequence | Unique    | <i>A. popoffii</i> CIP 105493                                                                                                                                                                           |
| <i>BN1129_RS04455</i> | Insertion sequence | Unique    | <i>A. popoffii</i> CIP 105493                                                                                                                                                                           |
| <i>WL1483_RS12635</i> | Insertion sequence | Unique    | <i>A. schubertii</i> strain WL1483                                                                                                                                                                      |
| <i>WL1483_RS02235</i> | Insertion sequence | Unique    | <i>A. schubertii</i> strain WL1483                                                                                                                                                                      |
| <i>WL1483_RS12545</i> | Insertion sequence | Unique    | <i>A. schubertii</i> strain WL1483                                                                                                                                                                      |
| <i>WL1483_RS16190</i> | Insertion sequence | Unique    | <i>A. schubertii</i> strain WL1483                                                                                                                                                                      |
| <i>WL1483_RS00170</i> | Insertion sequence | Unique    | <i>A. schubertii</i> strain WL1483                                                                                                                                                                      |
| <i>BN1134_RS17400</i> | Insertion sequence | Unique    | <i>A. simiae</i> CIP 107798                                                                                                                                                                             |
| <i>BN1134_RS03920</i> | Insertion sequence | Unique    | <i>A. simiae</i> CIP 107798                                                                                                                                                                             |
| <i>BN1115_RS13655</i> | Plasmid            | Unique    | <i>A. allosaccharophila</i> CECT 4199                                                                                                                                                                   |
| <i>BN1115_RS00095</i> | Plasmid            | Unique    | <i>A. allosaccharophila</i> CECT 4199                                                                                                                                                                   |
| <i>BOQ57_RS11275</i>  | Plasmid            | Unique    | <i>A. aquatica</i> MX16A                                                                                                                                                                                |
| <i>BOQ57_RS11515</i>  | Plasmid            | Unique    | <i>A. aquatica</i> MX16A                                                                                                                                                                                |
| <i>BOQ57_RS11375</i>  | Plasmid            | Unique    | <i>A. aquatica</i> MX16A                                                                                                                                                                                |
| <i>BOQ57_RS11420</i>  | Plasmid            | Unique    | <i>A. aquatica</i> MX16A                                                                                                                                                                                |
| <i>BOQ57_RS11425</i>  | Plasmid            | Unique    | <i>A. aquatica</i> MX16A                                                                                                                                                                                |
| <i>BOQ57_RS11350</i>  | Plasmid            | Unique    | <i>A. aquatica</i> MX16A                                                                                                                                                                                |
| <i>BOQ57_RS11530</i>  | Plasmid            | Unique    | <i>A. aquatica</i> MX16A                                                                                                                                                                                |
| <i>BOQ57_RS11510</i>  | Plasmid            | Unique    | <i>A. aquatica</i> MX16A                                                                                                                                                                                |
| <i>BOQ57_RS11535</i>  | Plasmid            | Unique    | <i>A. aquatica</i> MX16A                                                                                                                                                                                |
| <i>BOQ57_RS11440</i>  | Plasmid            | Unique    | <i>A. aquatica</i> MX16A                                                                                                                                                                                |
| <i>BOQ57_RS11450</i>  | Plasmid            | Unique    | <i>A. aquatica</i> MX16A                                                                                                                                                                                |
| <i>BOQ57_RS11355</i>  | Plasmid            | Unique    | <i>A. aquatica</i> MX16A                                                                                                                                                                                |
| <i>BOQ57_RS11445</i>  | Plasmid            | Unique    | <i>A. aquatica</i> MX16A                                                                                                                                                                                |
| <i>BOQ57_RS11525</i>  | Plasmid            | Unique    | <i>A. aquatica</i> MX16A                                                                                                                                                                                |
| <i>BOQ57_RS11390</i>  | Plasmid            | Unique    | <i>A. aquatica</i> MX16A                                                                                                                                                                                |
| <i>BOQ57_RS11200</i>  | Plasmid            | Unique    | <i>A. aquatica</i> MX16A                                                                                                                                                                                |
| <i>BOQ57_RS11380</i>  | Plasmid            | Unique    | <i>A. aquatica</i> MX16A                                                                                                                                                                                |
| <i>BOQ57_RS11345</i>  | Plasmid            | Unique    | <i>A. aquatica</i> MX16A                                                                                                                                                                                |
| <i>BOQ57_RS11520</i>  | Plasmid            | Unique    | <i>A. aquatica</i> MX16A                                                                                                                                                                                |
| <i>BOQ57_RS11540</i>  | Plasmid            | Unique    | <i>A. aquatica</i> MX16A                                                                                                                                                                                |
| <i>BOQ57_RS11285</i>  | Plasmid            | Unique    | <i>A. aquatica</i> MX16A                                                                                                                                                                                |
| <i>BOQ57_RS11270</i>  | Plasmid            | Unique    | <i>A. aquatica</i> MX16A                                                                                                                                                                                |
| <i>BOQ57_RS11385</i>  | Plasmid            | Unique    | <i>A. aquatica</i> MX16A                                                                                                                                                                                |

|                       |          |        |                                   |
|-----------------------|----------|--------|-----------------------------------|
| <i>BOQ57_RS11410</i>  | Plasmid  | Unique | <i>A. aquatica</i> MX16A          |
| <i>BOQ57_RS11455</i>  | Plasmid  | Unique | <i>A. aquatica</i> MX16A          |
| <i>BOQ57_RS11545</i>  | Plasmid  | Unique | <i>A. aquatica</i> MX16A          |
| <i>BOQ57_RS11415</i>  | Plasmid  | Unique | <i>A. aquatica</i> MX16A          |
| <i>BOQ57_RS11290</i>  | Plasmid  | Unique | <i>A. aquatica</i> MX16A          |
| <i>BOQ57_RS11240</i>  | Plasmid  | Unique | <i>A. aquatica</i> MX16A          |
| <i>BOQ57_RS11235</i>  | Plasmid  | Unique | <i>A. aquatica</i> MX16A          |
| <i>BOQ57_RS11340</i>  | Plasmid  | Unique | <i>A. aquatica</i> MX16A          |
| <i>BN1117_RS03960</i> | Plasmid  | Unique | <i>A. australiensis</i> CECT 8023 |
| <i>BN1118_RS09595</i> | Plasmid  | Unique | <i>A. bestiarum</i> CECT 4227     |
| <i>BN1121_RS14320</i> | Plasmid  | Unique | <i>A. diversa</i> CECT 4254       |
| <i>BN1121_RS14315</i> | Plasmid  | Unique | <i>A. diversa</i> CECT 4254       |
| <i>BN1121_RS02805</i> | Plasmid  | Unique | <i>A. diversa</i> CECT 4254       |
| <i>B224_RS04125</i>   | Plasmid  | Unique | <i>A. media</i> WS                |
| <i>B224_RS04115</i>   | Plasmid  | Unique | <i>A. media</i> WS                |
| <i>B224_RS04120</i>   | Plasmid  | Unique | <i>A. media</i> WS                |
| <i>B224_RS04140</i>   | Plasmid  | Unique | <i>A. media</i> WS                |
| <i>B224_RS04130</i>   | Plasmid  | Unique | <i>A. media</i> WS                |
| <i>B224_RS21885</i>   | Plasmid  | Unique | <i>A. media</i> WS                |
| <i>B224_RS06455</i>   | Plasmid  | Unique | <i>A. media</i> WS                |
| <i>B224_RS06440</i>   | Plasmid  | Unique | <i>A. media</i> WS                |
| <i>B224_RS04135</i>   | Plasmid  | Unique | <i>A. media</i> WS                |
| <i>BN1129_RS11635</i> | Plasmid  | Unique | <i>A. popoffii</i> CIP 105493     |
| <i>BN1130_RS17465</i> | Plasmid  | Unique | <i>A. rivuli</i> DSM 22539        |
| <i>AXW79_RS09240</i>  | Plasmid  | Unique | <i>A. salmonicida</i> ATCC 33658  |
| <i>AXW79_RS09250</i>  | Plasmid  | Unique | <i>A. salmonicida</i> ATCC 33658  |
| <i>BN1134_RS03990</i> | Plasmid  | Unique | <i>A. simiae</i> CIP 107798       |
| <i>BN1134_RS03995</i> | Plasmid  | Unique | <i>A. simiae</i> CIP 107798       |
| <i>BN1134_RS03980</i> | Plasmid  | Unique | <i>A. simiae</i> CIP 107798       |
| <i>BN1134_RS14735</i> | Plasmid  | Unique | <i>A. simiae</i> CIP 107798       |
| <i>BN1118_RS19665</i> | Prophage | Unique | <i>A. bestiarum</i> CECT 4227     |
| <i>BN1130_RS19510</i> | Virus    | Unique | <i>A. rivuli</i> DSM 22539        |
| <i>BN1130_RS19475</i> | Virus    | Unique | <i>A. rivuli</i> DSM 22539        |
| <i>BN1130_RS19485</i> | Virus    | Unique | <i>A. rivuli</i> DSM 22539        |

---
