# Supplementary material for: Comprehensive Analysis Reveals the Evolution and Pathogenicity of Aeromonas, Viewed from Both Single Isolated Species and Microbial Communities
Source: PubMed Central journal article supplement (PMC6811364; doi:10.1128/msystems.00252-19), 2019-10-22
Supplement: mSystems.00252-19-st005.pdf [file mSystems.00252-19-st005.pdf]

Supplementary Table S5. Virulence factors were identified by type and the counts for each *Aeromonas* strain.

| Strain                                | Flp          |                  | MSHA         |                | Tap          |                 | Type I |      |      | Iron  |        | Other |
|---------------------------------------|--------------|------------------|--------------|----------------|--------------|-----------------|--------|------|------|-------|--------|-------|
|                                       | type IV pili | Lateral flagella | type IV pili | Polar flagella | type IV pili | Type I fimbriae | T2SS   | T3SS | T6SS | Toxin | uptake |       |
| <i>A. popoffii</i> CIP 105493         | 0            | 1                | 17           | 60             | 16           | 5               | 14     | 0    | 22   | 10    | 9      | 3     |
| <i>A. rivuli</i> DSM 22539            | 1            | 31               | 16           | 63             | 14           | 2               | 15     | 0    | 20   | 3     | 9      | 4     |
| <i>A. dhakensis</i> AAK1              | 0            | 1                | 17           | 65             | 19           | 5               | 15     | 0    | 21   | 9     | 9      | 4     |
| <i>A. piscicola</i> LMG 24783         | 13           | 32               | 17           | 71             | 21           | 4               | 14     | 37   | 21   | 6     | 9      | 4     |
| <i>A. molluscorum</i> 848             | 0            | 1                | 17           | 54             | 12           | 2               | 14     | 0    | 0    | 3     | 9      | 4     |
| <i>A. jandaei</i> CECT 4228           | 0            | 32               | 16           | 71             | 19           | 5               | 15     | 35   | 19   | 4     | 9      | 2     |
| <i>A. allosaccharophila</i> CECT 4199 | 1            | 1                | 17           | 60             | 19           | 0               | 15     | 2    | 0    | 3     | 9      | 2     |
| <i>A. media</i> WS                    | 0            | 0                | 5            | 35             | 12           | 2               | 15     | 0    | 2    | 4     | 8      | 3     |
| <i>A. caviae</i> CECT 838             | 0            | 32               | 16           | 63             | 21           | 2               | 15     | 0    | 19   | 3     | 9      | 3     |
| <i>A. schubertii</i> strain WL1483    | 0            | 30               | 16           | 68             | 13           | 5               | 15     | 37   | 2    | 2     | 9      | 6     |
| <i>A. salmonicida</i> ATCC 33658      | 10           | 32               | 10           | 66             | 20           | 5               | 15     | 5    | 15   | 5     | 9      | 4     |
| <i>A. australiensis</i> CECT 8023     | 0            | 1                | 17           | 59             | 20           | 0               | 15     | 0    | 0    | 3     | 9      | 1     |
| <i>A. simiae</i> CIP 107798           | 0            | 11               | 17           | 61             | 13           | 2               | 15     | 0    | 20   | 2     | 6      | 3     |
| <i>A. taiwanensis</i> LMG 24683       | 0            | 32               | 16           | 65             | 13           | 2               | 15     | 0    | 0    | 3     | 9      | 4     |
| <i>A. lacus</i> AE122                 | 0            | 32               | 17           | 67             | 20           | 2               | 15     | 35   | 20   | 3     | 9      | 2     |
| <i>A. veronii</i> CECT 4257           | 13           | 1                | 17           | 60             | 20           | 5               | 14     | 0    | 0    | 4     | 9      | 4     |
| <i>A. hydrophila</i> ATCC 7966        | 13           | 1                | 14           | 65             | 19           | 5               | 15     | 0    | 22   | 12    | 9      | 4     |
| <i>A. eucrenophila</i> CECT 4224      | 0            | 32               | 17           | 65             | 21           | 2               | 15     | 0    | 20   | 3     | 9      | 3     |
| <i>A. sobria</i> CECT 4245            | 0            | 1                | 17           | 58             | 21           | 5               | 15     | 0    | 24   | 5     | 9      | 2     |
| <i>A. bestiarum</i> CECT 4227         | 0            | 1                | 17           | 65             | 18           | 5               | 15     | 0    | 23   | 12    | 9      | 5     |
| <i>A. encheleia</i> CECT 4342         | 0            | 32               | 16           | 65             | 18           | 2               | 15     | 38   | 20   | 3     | 9      | 3     |
| <i>A. tecta</i> CECT 7082             | 0            | 32               | 17           | 65             | 19           | 2               | 15     | 34   | 20   | 3     | 9      | 3     |
| <i>A. finlandensis</i> 4287D          | 4            | 32               | 16           | 69             | 19           | 4               | 15     | 37   | 21   | 3     | 9      | 2     |
| <i>A. aquatica</i> MX16A              | 0            | 1                | 17           | 60             | 22           | 5               | 15     | 0    | 22   | 12    | 9      | 5     |
| <i>A. bivalvium</i> CECT 7113         | 0            | 31               | 16           | 63             | 21           | 2               | 14     | 0    | 22   | 3     | 9      | 4     |
| <i>A. enteropelogenes</i> CECT 4487   | 0            | 32               | 17           | 70             | 19           | 0               | 15     | 0    | 19   | 5     | 8      | 5     |
| <i>A. diversa</i> CECT 4254           | 0            | 32               | 17           | 69             | 15           | 0               | 15     | 34   | 0    | 5     | 9      | 1     |
| <i>A. fluvialis</i> LMG 24681         | 0            | 1                | 17           | 63             | 19           | 0               | 15     | 0    | 1    | 3     | 9      | 2     |
| <i>A. sanarellii</i> LMG 24682        | 0            | 1                | 15           | 65             | 14           | 2               | 15     | 0    | 0    | 3     | 9      | 3     |
